# Supplementary material for: Rational strategy of magnetic relaxation switches for glycoprotein sensing
Source: Royal Society of Chemistry journal article supplement (doi:10.1039/c0an00362j), 2010-10-14
Supplement: c0an00362j.pdf [file c0an00362j.pdf]

## Rational strategy of magnetic relaxation switches for glycoprotein sensing

Shaoyu Cai, Guohai Liang, Peng Zhang, Hui Chen, Song Zhang, Baohong Liu and Jilie Kong\*

Fig. S1

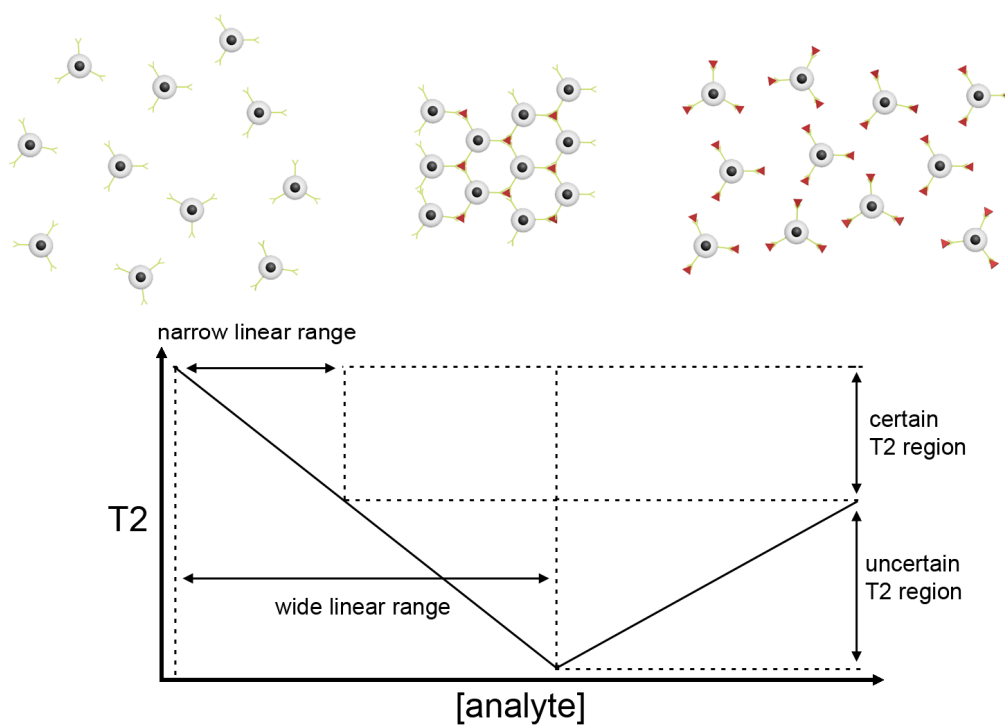

Fig. S1 Prozone effect in magnetic relaxation switches.
